# Supplementary material for: Development of a Wilks feature importance method with improved variable rankings for supporting hydrological inference and modelling
Source: Copernicus journal article supplement (doi:10.5194/hess-25-4947-2021), 2021-09-09
Supplement: Supplementary file 1 [file hess-25-4947-2021-supplement.pdf]

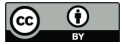

*Supplement of*

## **Development of a Wilks feature importance method with improved variable rankings for supporting hydrological inference and modelling**

**Kailong Li et al.**

*Correspondence to:* Guohe Huang ([huangg@uregina.ca](mailto:huangg@uregina.ca))

The copyright of individual parts of the supplement might differ from the article licence.

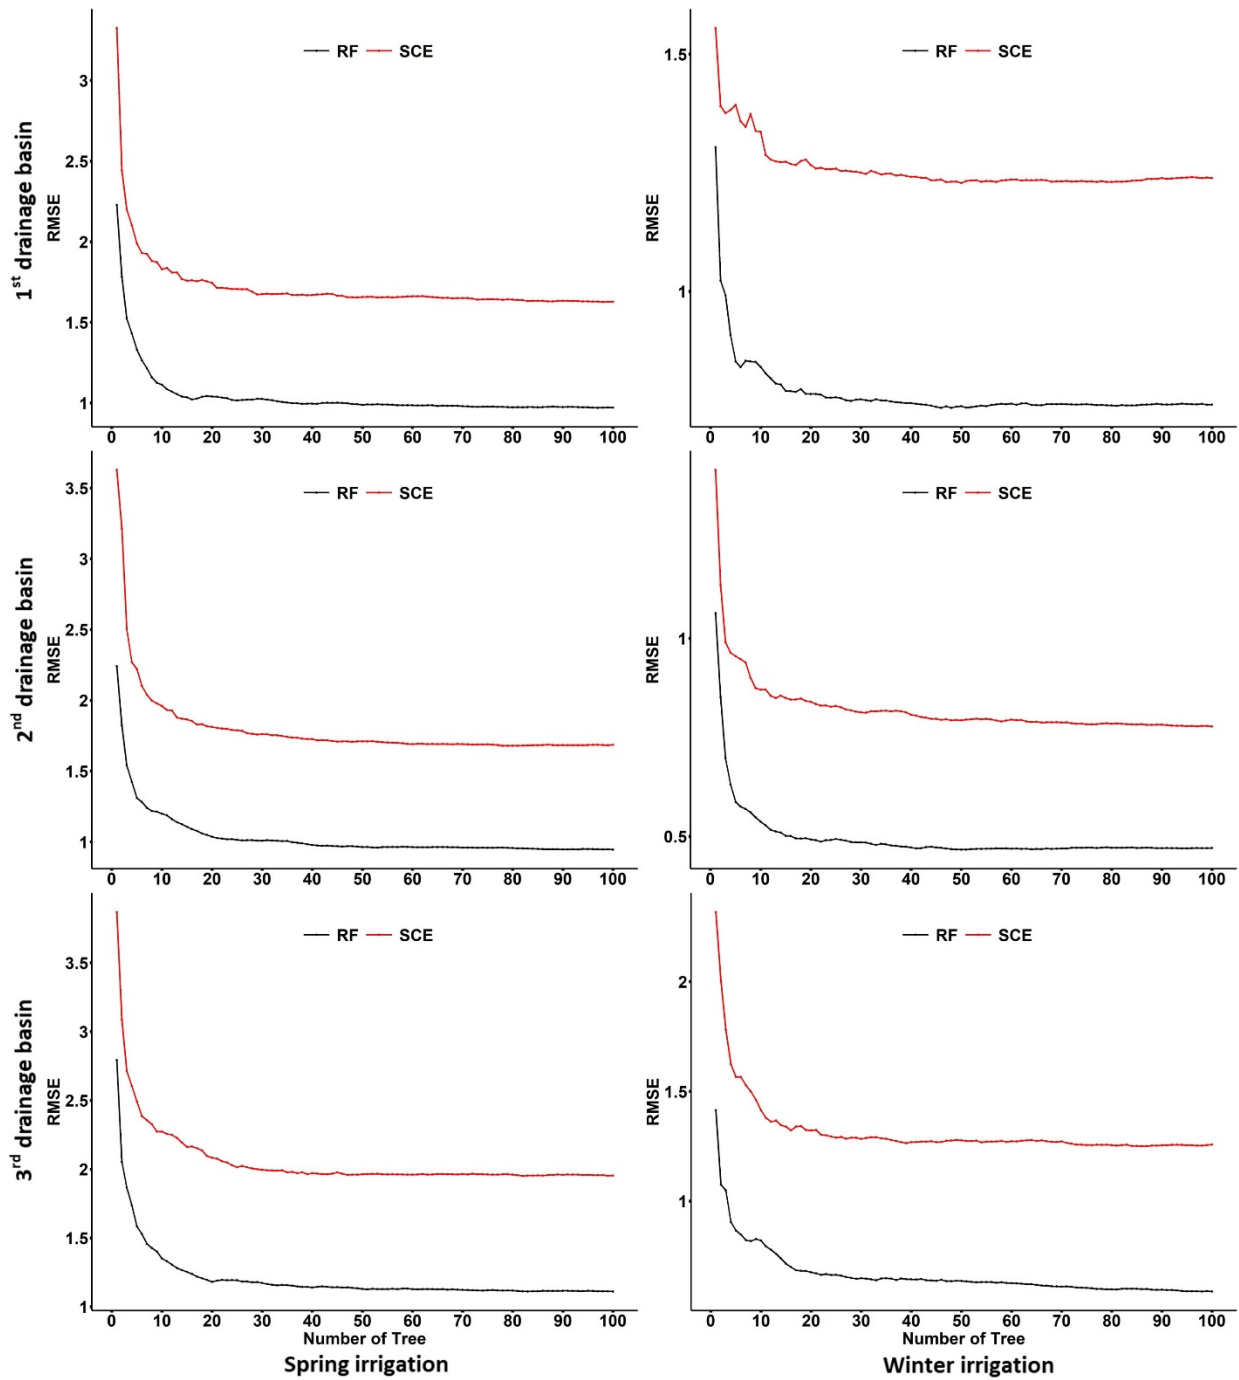

**Figure S1.** Convergence of the SCE and RF model based on RMSE for the training dataset.

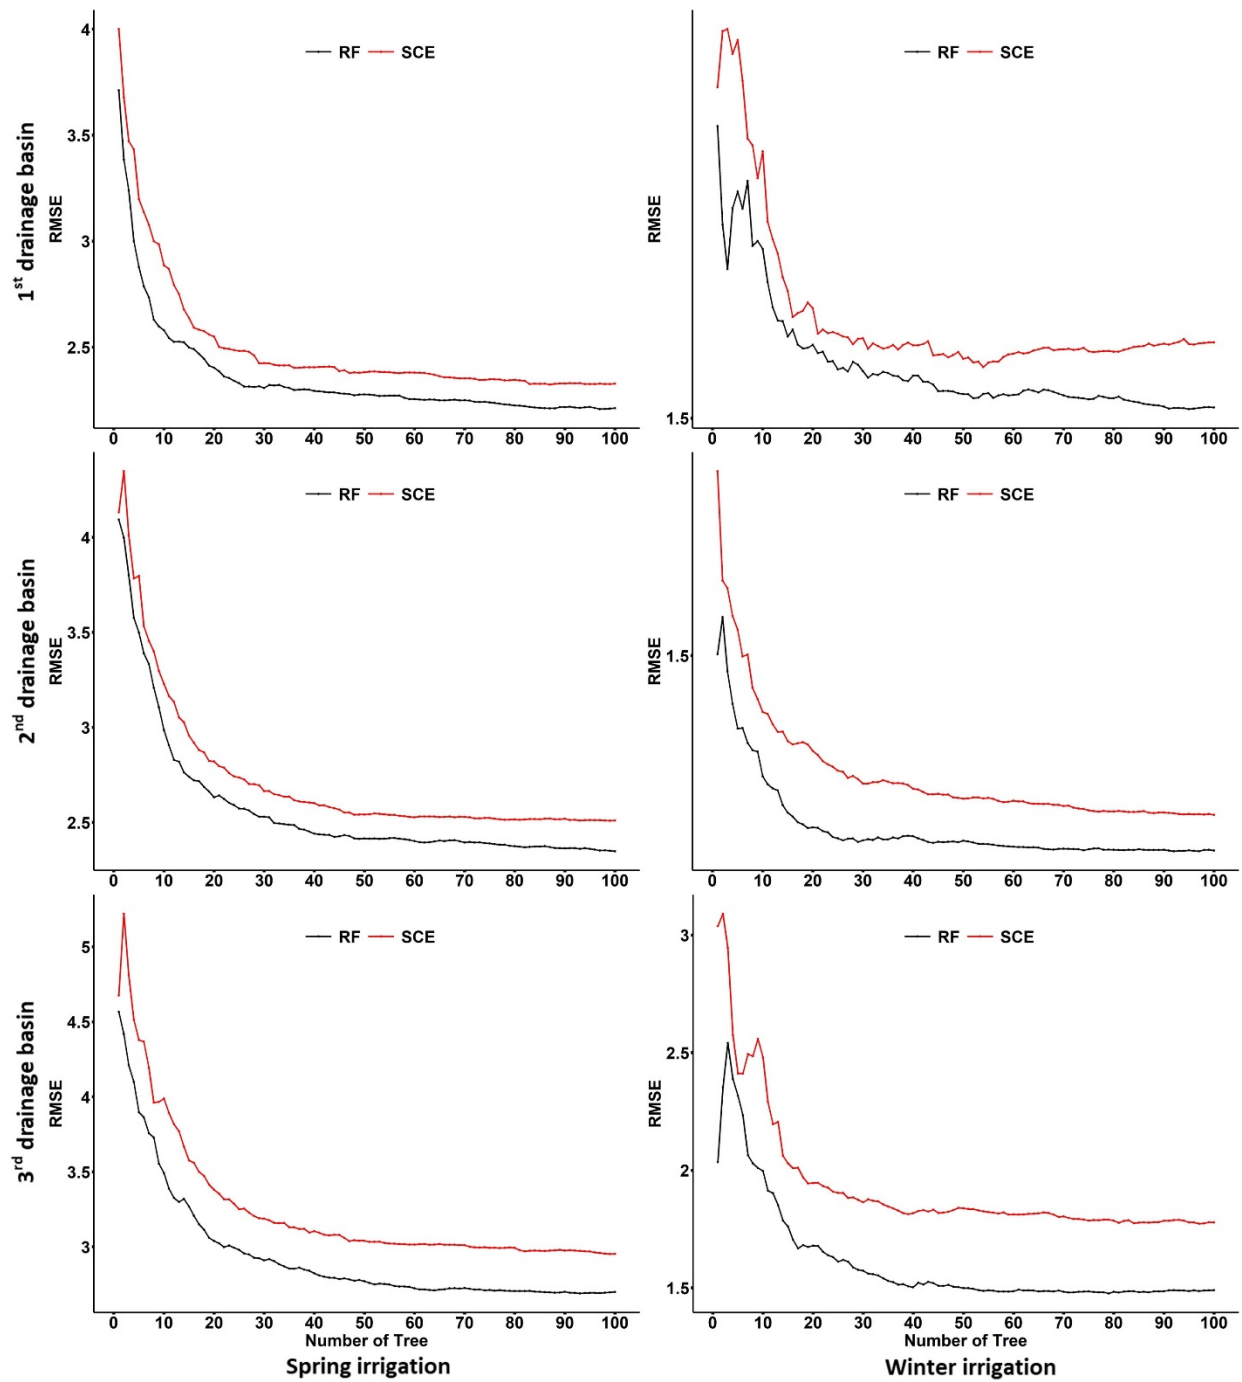

**Figure S2.** Convergence of the SCE and RF model based on RMSE for the OOB validation dataset.

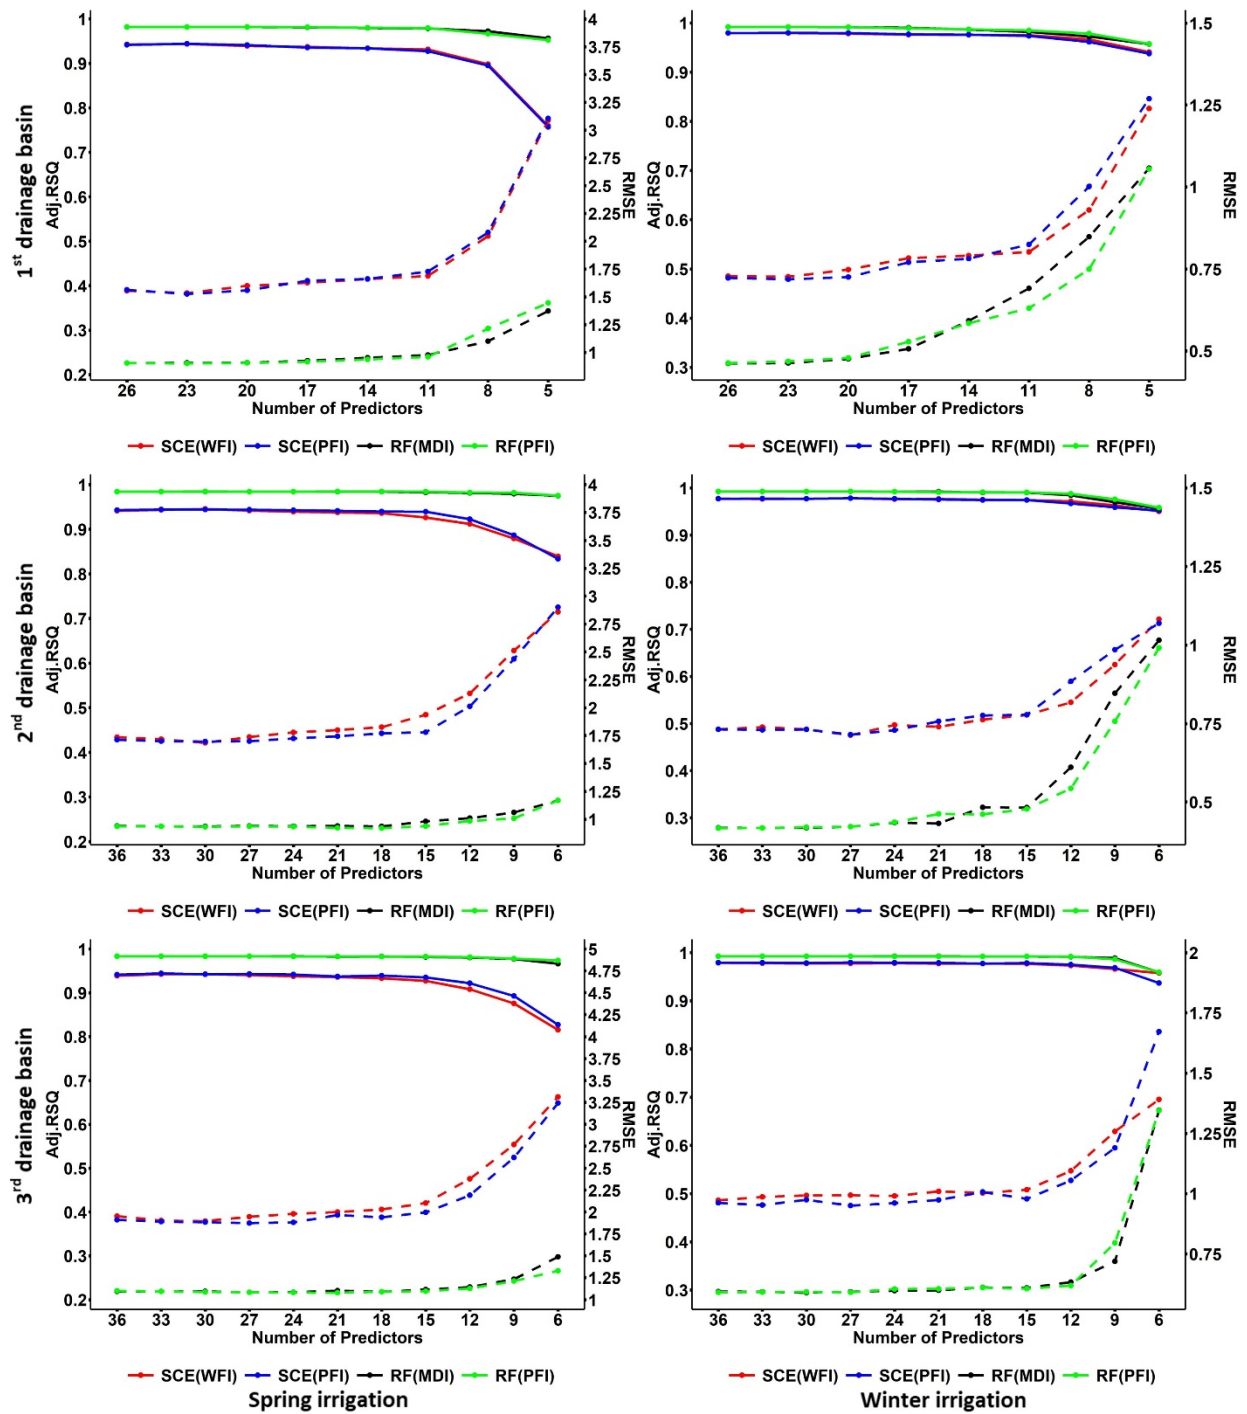

**Figure S3.** Iterative change in accuracy for the training dataset. Note that the solid lines indicate adjusted  $R^2$ , while the dashed lines represent RMSE.

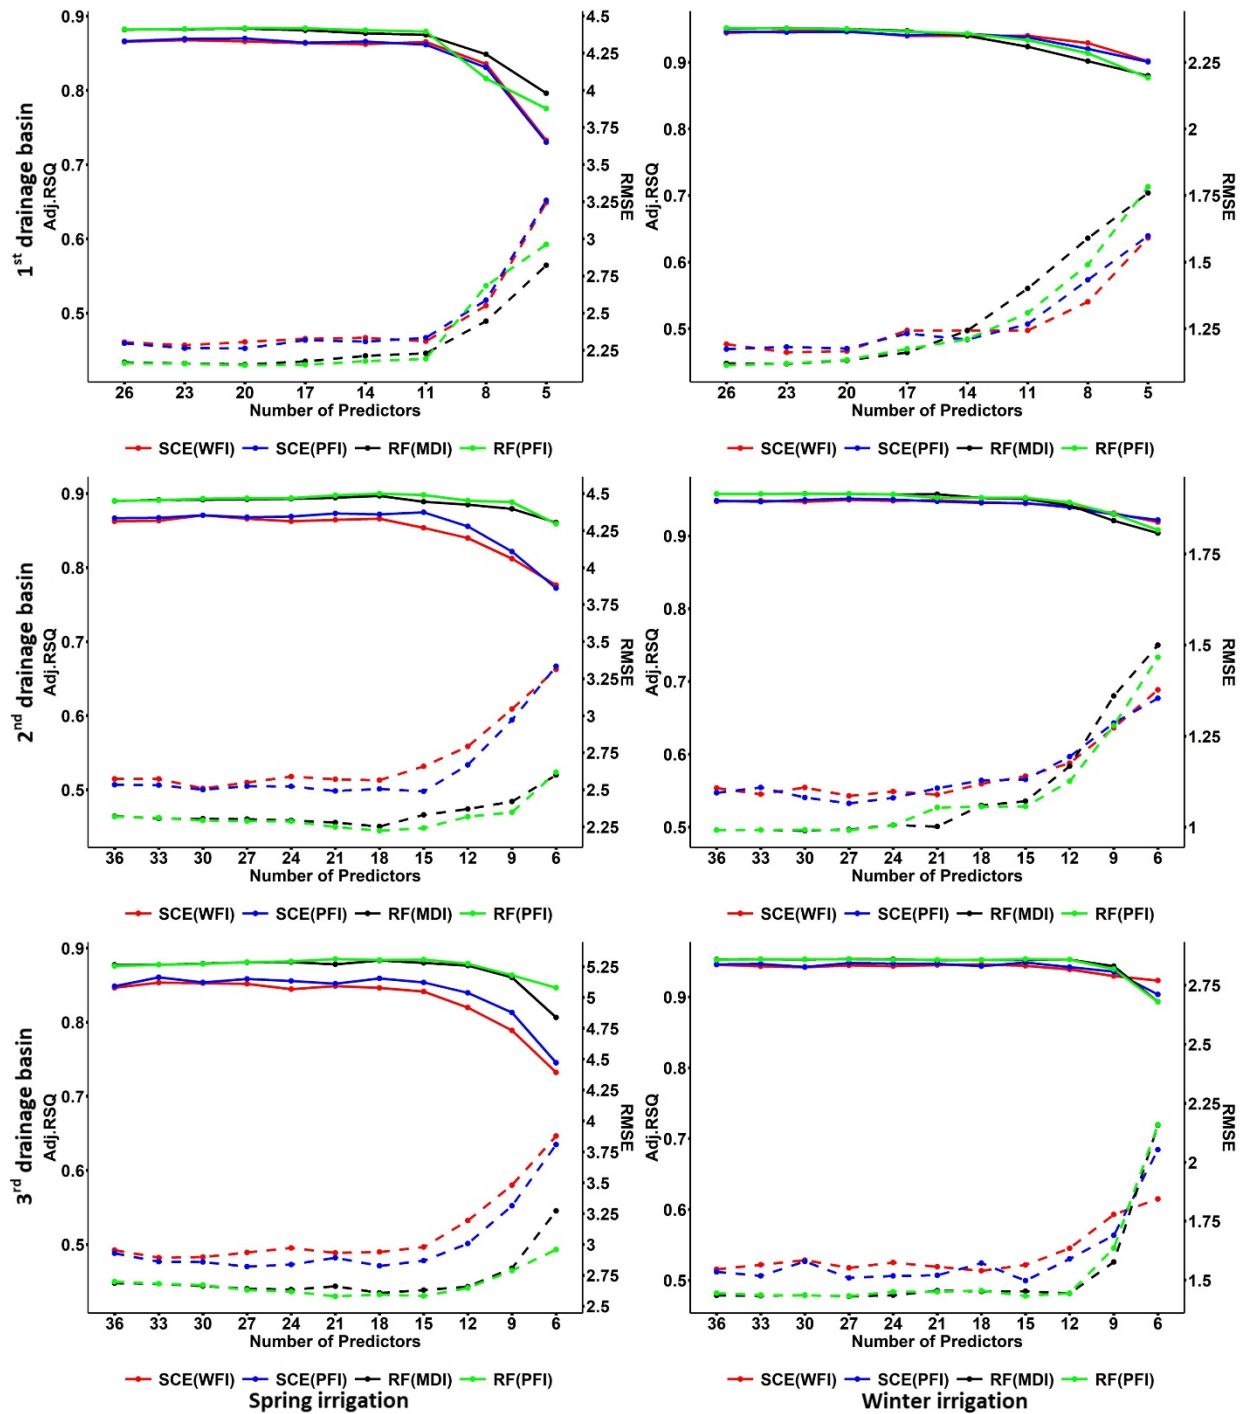

**Figure S4.** Iterative change in accuracy for the OOB validation dataset. Note that the solid lines indicate adjusted  $R^2$ , while the dashed lines represent RMSE.

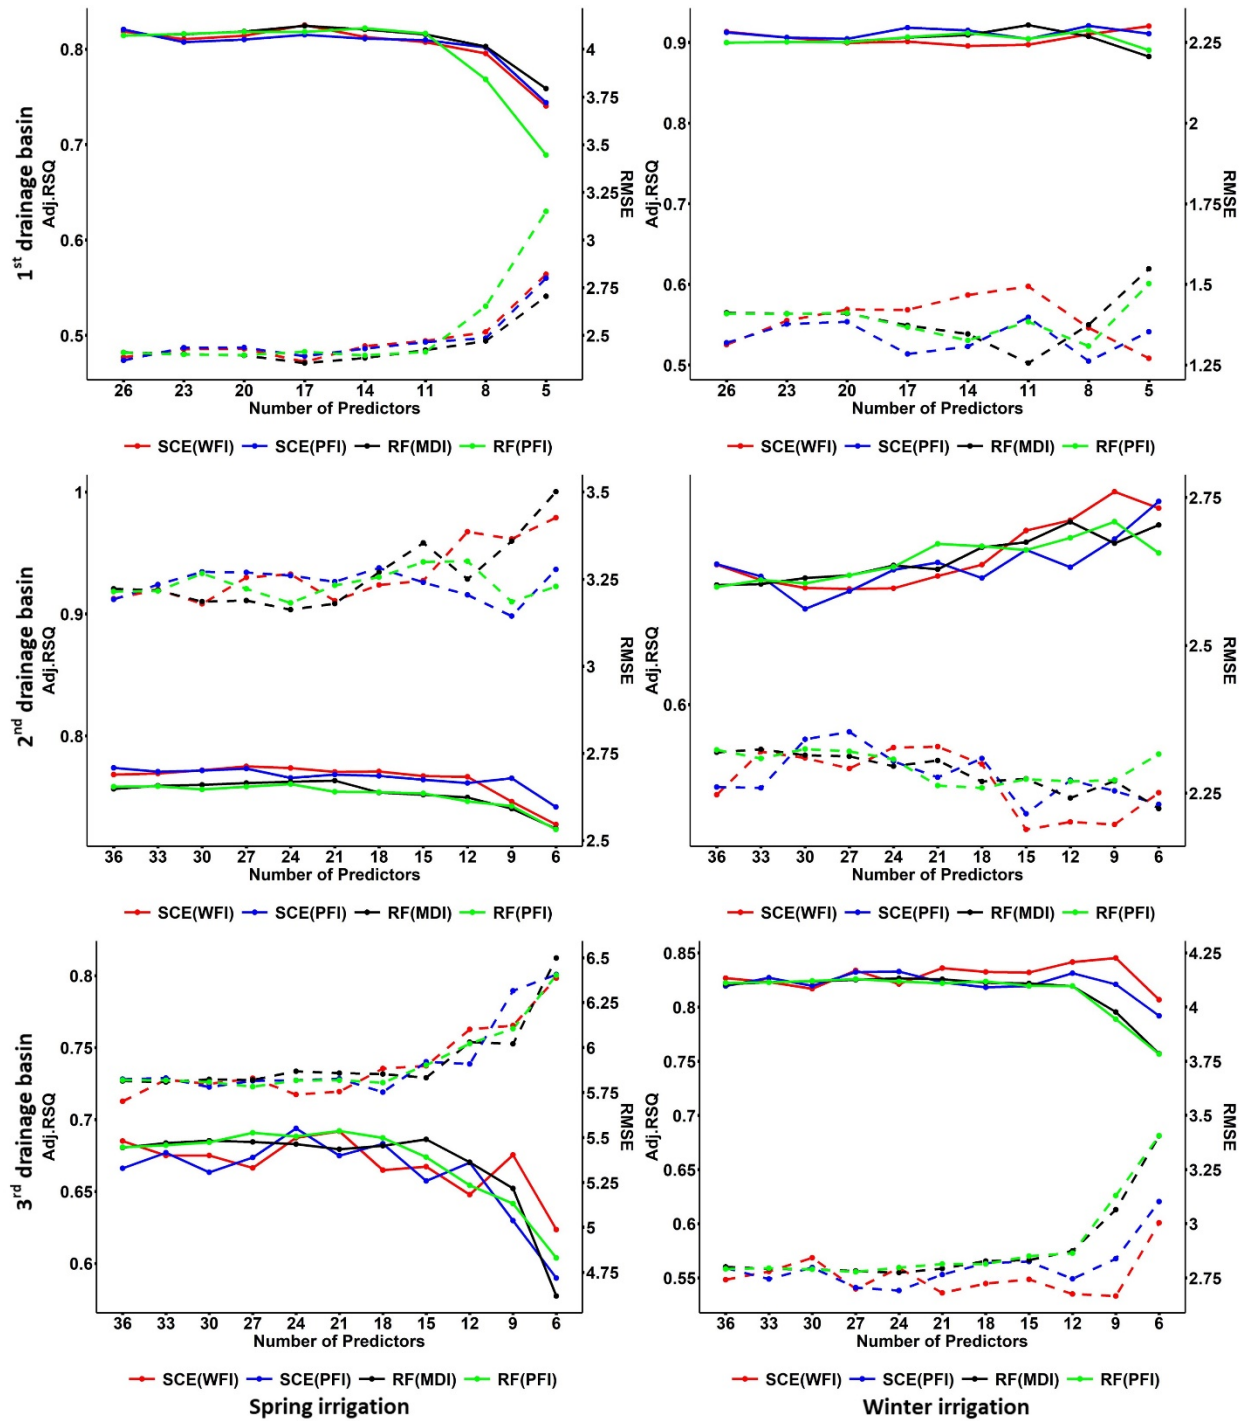

**Figure S5.** Iterative change in accuracy for the testing dataset. Note that the solid lines indicate adjusted  $R^2$ , while the dashed lines represent RMSE.
